# Supplementary material for: Neoadjuvant Therapy for Extrahepatic Biliary Tract Cancer: A Propensity Score-Matched Survival Analysis
Source: MDPI journal article supplement (doi:10.3390/jcm12072654), 2023-04-02
Supplement: s1 [file s1]

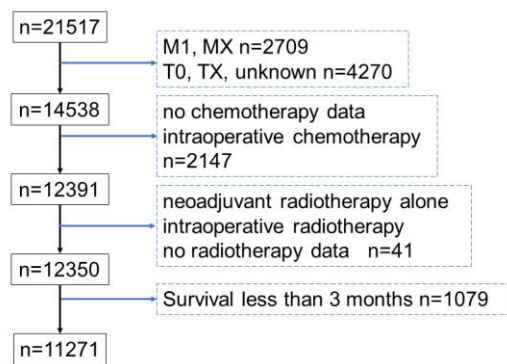

**Supplemental Figure S1.** Flowchart for selection of patients with extrahepatic bile tract cancer included in the study cohort.

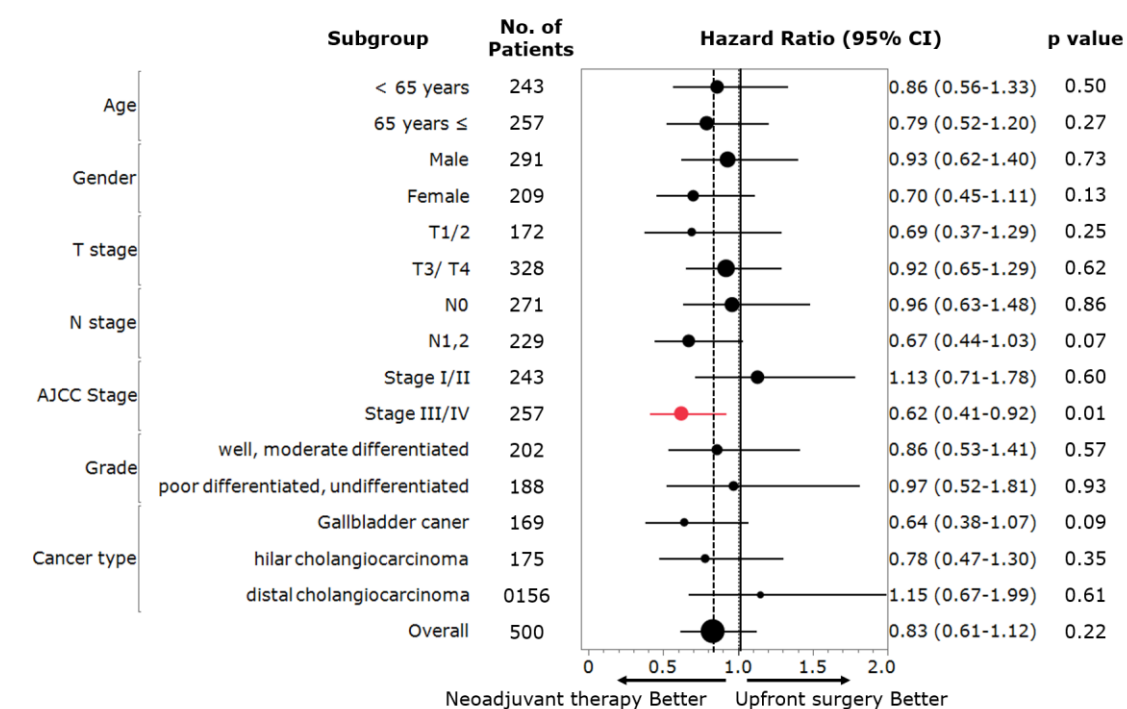

**Supplemental Figure S2.** Subgroup analyses of cancer-specific survival in the PSM

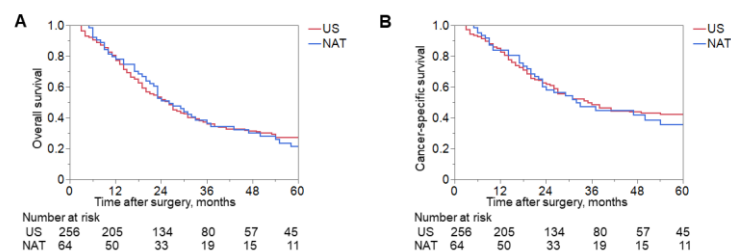

population.

**Supplemental Figure S3.** Kaplan–Meier curves depicting overall (A) and cancer-specific survival (B) stratified by use of NAT among patients with extrahepatic cholangiocarcinomas.

**Supplemental Table S1.** Univariate and multivariate Cox regression analyses with OS and CSS among patients with extrahepatic biliary tract cancer before propensity score matching.

| Variables                    | Reference      | HR   | 95%CI     | p      | HR   | 95%CI     | p      |
|------------------------------|----------------|------|-----------|--------|------|-----------|--------|
| <b>OS</b>                    |                |      |           |        |      |           |        |
| Age ≥ 65                     | < 65           | 1.40 | 1.31-1.49 | < 0.01 | 1.44 | 1.35-1.53 | < 0.01 |
| Male                         | Female         | 1.06 | 0.87-0.98 | < 0.01 | 1.06 | 1.00-1.12 | 0.06   |
| White                        | Other          | 1.08 | 1.01-1.16 | 0.02   | 1.04 | 0.97-1.11 | 0.25   |
| GBC                          | EHCC           | 0.88 | 0.83-0.94 | < 0.01 | 1.12 | 1.04-1.20 | < 0.01 |
| Grade poor, undifferentiated | Well, moderate | 1.55 | 1.46-1.65 | < 0.01 | 1.36 | 1.28-1.45 | < 0.01 |
| T3/4                         | T1/2           | 2.02 | 1.91-2.15 | < 0.01 | 1.90 | 1.78-2.03 | < 0.01 |
| N1/2                         | N0             | 1.65 | 1.56-1.75 | < 0.01 | 1.43 | 1.34-1.53 | < 0.01 |
| Stages III/IVA               | Stages I/II    | 1.93 | 1.82-2.04 | < 0.01 | -    | -         | -      |
| Neoadjuvant therapy          | No             | 1.05 | 0.83-1.31 | 0.67   | 0.86 | 0.68-1.09 | 0.22   |
| Adjuvant therapy             | No             | 1.13 | 1.07-1.20 | < 0.01 | 0.87 | 0.81-0.93 | < 0.01 |
| <b>CSS</b>                   |                |      |           |        |      |           |        |
| Age ≥ 65                     | < 65           | 1.13 | 1.05-1.22 | < 0.01 | 1.20 | 1.19-1.29 | < 0.01 |
| Male                         | Female         | 1.05 | 0.97-1.12 | 0.16   | 1.05 | 0.98-1.13 | 0.15   |
| White                        | Other          | 1.01 | 0.93-1.10 | 0.65   | 0.97 | 0.90-1.06 | 0.6    |
| GBC                          | EHCC           | 0.92 | 0.86-1.00 | 0.04   | 1.26 | 1.16-1.36 | < 0.01 |
| Grade poor, undifferentiated | Well, moderate | 1.74 | 1.61-1.87 | < 0.01 | 1.47 | 1.37-1.58 | < 0.01 |
| T3/4                         | T1/2           | 2.49 | 2.32-2.67 | < 0.01 | 2.28 | 2.11-2.46 | < 0.01 |
| N1/2                         | N0             | 1.86 | 1.73-2.00 | < 0.01 | 1.47 | 1.36-1.59 | < 0.01 |
| Stages III/IVA               | Stages I/II    | 2.45 | 2.28-2.62 | < 0.01 | -    | -         | -      |
| Neoadjuvant therapy          | No             | 1.06 | 0.82-1.39 | 0.62   | 0.84 | 0.64-1.10 | 0.21   |
| Adjuvant therapy             | No             | 1.35 | 1.26-1.45 | < 0.01 | 0.95 | 0.88-1.03 | 0.28   |

OS: overall survival; CSS: cancer specific survival; GBC: gallbladder cancer; EHCC: extrahepatic cholangiocarcinoma.

**Supplemental Table S2.** Patient characteristics after propensity score matching stratified by neoadjuvant therapy.

| Variable                  | Upfront surgery |        | Neoadjuvant therapy |        | p value |
|---------------------------|-----------------|--------|---------------------|--------|---------|
|                           | n = 400         | %, IQR | n = 100             | %, IQR |         |
| Age, n (%)                |                 |        |                     |        | 0.72    |
| < 65 years                | 196             | 49.0   | 47                  | 47.0   |         |
| ≥ 65 years                | 204             | 51.0   | 53                  | 53.0   |         |
| Gender, n (%)             |                 |        |                     |        | 0.34    |
| Male                      | 237             | 59.2   | 54                  | 54.0   |         |
| Female                    | 163             | 40.8   | 46                  | 46.0   |         |
| Race, n (%)               |                 |        |                     |        | 0.41    |
| White                     | 326             | 81.5   | 85                  | 85.0   |         |
| Others                    | 74              | 18.5   | 15                  | 15.0   |         |
| Type of cancer, n (%)     |                 |        |                     |        | 0.61    |
| Gallbladder cancer        | 131             | 32.7   | 38                  | 38.0   |         |
| Hilar cholangiocarcinoma  | 142             | 35.5   | 33                  | 33.0   |         |
| Distal cholangiocarcinoma | 127             | 31.8   | 29                  | 18.0   |         |
| Year of diagnosis, n (%)  |                 |        |                     |        | 0.92    |
| 2006–2009                 | 91              | 22.7   | 21                  | 21.0   |         |
| 2010–2013                 | 145             | 36.3   | 38                  | 38.0   |         |
| 2014–2017                 | 164             | 41.0   | 41                  | 41.0   |         |
| AJCC T stage, n (%)       |                 |        |                     |        | 0.54    |
| T1/2                      | 135             | 33.8   | 37                  | 37.0   |         |
| T3/4                      | 265             | 66.2   | 63                  | 63.0   |         |
| AJCC N stage, n (%)       |                 |        |                     |        | 0.35    |
| N0                        | 221             | 55.3   | 50                  | 50.0   |         |
| N1/2                      | 179             | 33.7   | 50                  | 50.0   |         |
| AJCC stage, n (%)         |                 |        |                     |        |         |
| Stages I/II               | 199             | 49.8   | 44                  | 44.0   |         |
| Stages III/IVA            | 201             | 51.2   | 56                  | 56.0   |         |
| Tumor grade, n (%)        |                 |        |                     |        | 0.51    |
| Well, moderate            | 162             | 40.5   | 40                  | 40.0   |         |
| Poor, undifferentiated    | 154             | 38.5   | 34                  | 34.0   |         |
| Unknown                   | 84              | 21.0   | 26                  | 26.0   |         |
| Adjuvant therapy, n (%)   | 207             | 51.8   | 46                  | 46.0   |         |

IQR: interquartile range; AJCC: American Joint Committee on Cancer.

**Supplemental Table S3.** Patient characteristics after propensity score matching among patients with stages III/IVA of the disease.

| Variable                  | Upfront surgery |        | Neoadjuvant therapy |        | p value |
|---------------------------|-----------------|--------|---------------------|--------|---------|
|                           | n = 201         | %, IQR | n = 56              | %, IQR |         |
| Age, n (%)                |                 |        |                     |        | 0.94    |
| < 65 years                | 98              | 48.8   | 27                  | 48.2   |         |
| ≥ 65 years                | 103             | 51.2   | 29                  | 51.8   |         |
| Gender, n (%)             |                 |        |                     |        | 0.57    |
| Male                      | 109             | 54.2   | 28                  | 50.0   |         |
| Female                    | 92              | 45.8   | 28                  | 50.0   |         |
| Race, n (%)               |                 |        |                     |        | 0.87    |
| White                     | 174             | 86.6   | 48                  | 85.7   |         |
| Others                    | 27              | 13.4   | 8                   | 14.3   |         |
| Type of cancer, n (%)     |                 |        |                     |        | 0.18    |
| Gallbladder cancer        | 99              | 49.2   | 33                  | 58.9   |         |
| Hilar cholangiocarcinoma  | 97              | 48.3   | 20                  | 35.7   |         |
| Distal cholangiocarcinoma | 5               | 2.5    | 3                   | 5.4    |         |
| Year of diagnosis, n (%)  |                 |        |                     |        | 0.21    |
| 2006–2009                 | 71              | 35.3   | 15                  | 26.8   |         |
| 2010–2013                 | 49              | 24.4   | 20                  | 35.7   |         |
| 2014–2017                 | 81              | 40.3   | 21                  | 37.5   |         |
| AJCC T stage, n (%)       |                 |        |                     |        | 0.87    |
| T1/2                      | 27              | 13.4   | 8                   | 14.3   |         |
| T3/4                      | 174             | 86.6   | 48                  | 85.7   |         |
| AJCC N stage, n (%)       |                 |        |                     |        | 0.53    |
| N0                        | 81              | 40.3   | 20                  | 35.7   |         |
| N1/2                      | 120             | 59.7   | 36                  | 64.3   |         |
| Tumor grade, n (%)        |                 |        |                     |        | 0.93    |
| Well, moderate            | 77              | 38.3   | 23                  | 41.1   |         |
| Poor, undifferentiated    | 79              | 39.3   | 21                  | 37.5   |         |
| Unknown                   | 45              | 22.4   | 12                  | 21.4   |         |
| Adjuvant therapy, n (%)   | 108             | 53.7   | 23                  | 41.1   | 0.09    |

IQR: interquartile range; AJCC: American Joint Committee on Cancer.

**Supplemental Table S4.** ECC patient characteristics after propensity score matching

stratified by neoadjuvant therapy.

| Variable                  | Upfront surgery |        | Neoadjuvant therapy |        | p value |
|---------------------------|-----------------|--------|---------------------|--------|---------|
|                           | n = 256         | %, IQR | n = 64              | %, IQR |         |
| Age, n (%)                |                 |        |                     |        | 0.73    |
| < 65 years                | 130             | 50.8   | 31                  | 48.4   |         |
| ≥ 65 years                | 126             | 49.2   | 33                  | 51.6   |         |
| Gender, n (%)             |                 |        |                     |        | 0.25    |
| Male                      | 183             | 71.5   | 41                  | 64.1   |         |
| Female                    | 73              | 28.5   | 23                  | 35.9   |         |
| Race, n (%)               |                 |        |                     |        | 0.52    |
| White                     | 216             | 84.4   | 56                  | 87.5   |         |
| Others                    | 40              | 15.6   | 8                   | 12.5   |         |
| Type of cancer, n (%)     |                 |        |                     |        | 0.46    |
| Hilar cholangiocarcinoma  | 149             | 58.2   | 34                  | 53.1   |         |
| Distal cholangiocarcinoma | 107             | 41.8   | 30                  | 46.9   |         |
| Year of diagnosis, n (%)  |                 |        |                     |        | 0.94    |
| 2006–2009                 | 51              | 19.9   | 13                  | 20.3   |         |
| 2010–2013                 | 95              | 37.1   | 25                  | 39.1   |         |
| 2014–2017                 | 110             | 43.0   | 26                  | 40.6   |         |
| AJCC T stage, n (%)       |                 |        |                     |        | 0.69    |
| T1/2                      | 109             | 42.6   | 29                  | 45.3   |         |
| T3/4                      | 147             | 57.4   | 35                  | 54.7   |         |
| AJCC N stage, n (%)       |                 |        |                     |        | 0.37    |
| N0                        | 128             | 50.0   | 36                  | 56.2   |         |
| N1/2                      | 128             | 50.0   | 28                  | 43.8   |         |
| AJCC Stage, n (%)         |                 |        |                     |        | 0.86    |
| Stages I/II               | 157             | 61.3   | 40                  | 62.5   |         |
| Stages III/IVA            | 99              | 38.7   | 24                  | 37.5   |         |
| Tumor grade, n (%)        |                 |        |                     |        | 0.45    |
| Well, moderate            | 99              | 38.6   | 27                  | 42.2   |         |
| Poor, undifferentiated    | 101             | 39.4   | 20                  | 31.2   |         |
| Unknown                   | 56              | 21.8   | 17                  | 26.6   |         |
| Adjuvant therapy, n (%)   | 134             | 52.3   | 35                  | 54.7   | 0.73    |
